# Supplementary material for: Efficacy and Safety of Difelikefalin in Japanese Patients With Moderate to Severe Pruritus Receiving Hemodialysis: A Randomized Clinical Trial
Source: PubMed Central journal article supplement — JAMA Netw Open. 2022 May 5;5(5):e2210339. doi: 10.1001/jamanetworkopen.2022.10339 (PMC9073569; doi:10.1001/jamanetworkopen.2022.10339), 2022-05-05
Supplement: jamanetwopen-e2210339-s002.pdf [file jamanetwopen-e2210339-s002.pdf]

## Supplementary Online Content

Narita I, Tsubakihara Y, Uchiyama T, et al; MR13A9-4 Trial Investigators. Efficacy and safety of difelikefalin in Japanese patients with moderate to severe pruritus receiving hemodialysis: a randomized clinical trial. *JAMA Netw Open*. 2022;5(5):e2210339.

doi:10.1001/jamanetworkopen.2022.10339

**eTable 1.** Administration Volume

**eTable 2.** Sensitivity Analyses in the Primary Endpoint

**eTable 3.** Subgroup Analyses in the Primary Endpoint

**eTable 4.** Skindex-16 Overall Score and 5-D Itch Scale Total Score at Week 4 and 8

**eTable 5.** Patient Global Impression of Change at the End of the Treatment Period

**eFigure.** Time Course of the Adjusted Weekly Mean Change  $\pm$  Standard Error in the Shiratori Severity Score

This supplementary material has been provided by the authors to give readers additional information about their work.

**eTable 1. Administration Volume**

| Dry weight (kg) | Administered volume (mL) | Dose of Difelikefalin (µg/kg) |         |         |         |
|-----------------|--------------------------|-------------------------------|---------|---------|---------|
|                 |                          | 0.25                          | 0.5     | 1.0     | Placebo |
| <45.0           | 0.35                     | 8.75 µg                       | 17.5 µg | 35.0 µg | 0 µg    |
| ≥45.0 to <65.0  | 0.50                     | 12.50 µg                      | 25.0 µg | 50.0 µg | 0 µg    |
| ≥65.0 to <85.0  | 0.70                     | 17.50 µg                      | 35.0 µg | 70.0 µg | 0 µg    |
| ≥85.0           | 0.85                     | 21.25 µg                      | 42.5 µg | 85.0 µg | 0 µg    |

**eTable 2. Sensitivity Analyses in the Primary Endpoint**

| Method of analysis - analysis population | Group (n) <sup>a</sup>        | n <sup>b</sup> | Adjusted weekly mean (SE) | Two-Sided 95% Confidence Interval |       |
|------------------------------------------|-------------------------------|----------------|---------------------------|-----------------------------------|-------|
|                                          |                               |                |                           | Lower                             | Upper |
| MMRM - FAS<br>(Primary endpoint)         | Difelikefalin 0.25 µg/kg (61) | 59             | -2.97 (0.29)              | -3.54                             | -2.39 |
|                                          | Difelikefalin 0.5 µg/kg (60)  | 53             | -3.65 (0.30)              | -4.24                             | -3.07 |
|                                          | Difelikefalin 1.0 µg/kg (59)  | 53             | -3.64 (0.30)              | -4.22                             | -3.06 |
|                                          | Placebo (63)                  | 58             | -2.86 (0.29)              | -3.42                             | -2.29 |
| MMRM - PPS                               | Difelikefalin 0.25 µg/kg (52) | 52             | -3.07 (0.32)              | -3.70                             | -2.44 |
|                                          | Difelikefalin 0.5 µg/kg (48)  | 48             | -3.54 (0.33)              | -4.19                             | -2.90 |
|                                          | Difelikefalin 1.0 µg/kg (41)  | 40             | -3.70 (0.35)              | -4.39                             | -3.02 |
|                                          | Placebo (53)                  | 52             | -2.92 (0.32)              | -3.54                             | -2.29 |
| MI-MMRM                                  | Difelikefalin 0.25 µg/kg (61) | 59             | -2.96 (0.29)              | -3.53                             | -2.38 |
|                                          | Difelikefalin 0.5 µg/kg (60)  | 53             | -3.63 (0.30)              | -4.21                             | -3.05 |
|                                          | Difelikefalin 1.0 µg/kg (59)  | 53             | -3.59 (0.30)              | -4.17                             | -3.01 |
|                                          | Placebo (63)                  | 58             | -2.84 (0.29)              | -3.40                             | -2.28 |
| Placebo MI-MMRM                          | Difelikefalin 0.25 µg/kg (61) | 59             | -2.96 (0.29)              | -3.54                             | -2.39 |
|                                          | Difelikefalin 0.5 µg/kg (60)  | 53             | -3.59 (0.30)              | -4.18                             | -3.00 |
|                                          | Difelikefalin 1.0 µg/kg (59)  | 53             | -3.62 (0.30)              | -4.20                             | -3.03 |
|                                          | Placebo (63)                  | 58             | -2.83 (0.29)              | -3.39                             | -2.27 |

a. number of patients at week 1, b. number of patients at week 8

Abbreviations: FAS, full analysis set; MI, multiple imputation; MMRM, mixed-effects model for repeated measures; PPS, per protocol set; SE, standard error

**eTable 3.** Subgroup Analyses in the Primary Endpoint

| Subgroup                                 | Group (n) <sup>a</sup>        | n <sup>b</sup> | Adjusted weekly mean (SE) | Two-Sided 95% Confidence Interval |       |
|------------------------------------------|-------------------------------|----------------|---------------------------|-----------------------------------|-------|
|                                          |                               |                |                           | Lower                             | Upper |
| Treatment history with nalfurafine - No  | Difelikefalin 0.25 µg/kg (31) | 29             | -2.65 (0.42)              | -3.47                             | -1.83 |
|                                          | Difelikefalin 0.5 µg/kg (30)  | 28             | -3.66 (0.42)              | -4.49                             | -2.83 |
|                                          | Difelikefalin 1.0 µg/kg (27)  | 26             | -3.23 (0.43)              | -4.08                             | -2.38 |
|                                          | Placebo (29)                  | 26             | -3.07 (0.42)              | -3.90                             | -2.25 |
| Treatment history with nalfurafine - Yes | Difelikefalin 0.25 µg/kg (30) | 30             | -3.34 (0.41)              | -4.16                             | -2.52 |
|                                          | Difelikefalin 0.5 µg/kg (30)  | 25             | -3.68 (0.42)              | -4.52                             | -2.84 |
|                                          | Difelikefalin 1.0 µg/kg (32)  | 27             | -3.95 (0.41)              | -4.76                             | -3.15 |
|                                          | Placebo (34)                  | 32             | -2.69 (0.39)              | -3.47                             | -1.92 |

a. number of patients at week 1, b. number of patients at week 8

Abbreviation: SE, standard error

**eTable 4.** Skindex-16 Overall Score and 5-D Itch Scale Total Score at Week 4 and 8

|                            | Group                    | Weeks | n  | Adjusted weekly mean (SE) | Two-Sided 95% Confidence Interval |        |
|----------------------------|--------------------------|-------|----|---------------------------|-----------------------------------|--------|
|                            |                          |       |    |                           | Lower                             | Upper  |
| Skindex-16 overall score   | Difelikefalin 0.25 µg/kg | 4     | 59 | -20.25 (1.85)             | -23.89                            | -16.60 |
|                            |                          | 8     | 59 | -24.25 (1.96)             | -28.11                            | -20.39 |
|                            | Difelikefalin 0.5 µg/kg  | 4     | 56 | -26.01 (1.91)             | -29.76                            | -22.25 |
|                            |                          | 8     | 53 | -27.79 (2.05)             | -31.83                            | -23.74 |
|                            | Difelikefalin 1.0 µg/kg  | 4     | 55 | -19.03 (1.91)             | -22.80                            | -15.25 |
|                            |                          | 8     | 54 | -22.69 (2.04)             | -26.71                            | -18.68 |
|                            | Placebo                  | 4     | 61 | -19.99 (1.82)             | -23.57                            | -16.41 |
|                            |                          | 8     | 59 | -24.04 (1.94)             | -27.87                            | -20.21 |
| 5-D itch scale total score | Difelikefalin 0.25 µg/kg | 4     | 59 | -5.3 (0.4)                | -6.0                              | -4.6   |
|                            |                          | 8     | 59 | -6.6 (0.3)                | -7.2                              | -5.9   |
|                            | Difelikefalin 0.5 µg/kg  | 4     | 56 | -6.3 (0.4)                | -7.0                              | -5.6   |
|                            |                          | 8     | 53 | -6.5 (0.4)                | -7.2                              | -5.8   |
|                            | Difelikefalin 1.0 µg/kg  | 4     | 55 | -5.7 (0.4)                | -6.5                              | -5.0   |
|                            |                          | 8     | 54 | -6.8 (0.3)                | -7.5                              | -6.2   |
|                            | Placebo                  | 4     | 61 | -4.5 (0.3)                | -5.2                              | -3.9   |
|                            |                          | 8     | 59 | -5.8 (0.3)                | -6.5                              | -5.2   |

Abbreviation: SE, standard error

**eTable 5.** Patient Global Impression of Change at the End of the Treatment Period

|                          |       | Difelikefalin ( $\mu\text{g}/\text{kg}$ ) |                 |                 | Placebo<br>N = 62 |
|--------------------------|-------|-------------------------------------------|-----------------|-----------------|-------------------|
|                          |       | 0.25                                      | 0.5             | 1.0             |                   |
|                          |       | N = 61                                    | N = 59          | N = 60          |                   |
| Very much improved       | n (%) | 12 (19.7)                                 | 22 (37.3)       | 19 (31.7)       | 11 (17.7)         |
| Much improved            | n (%) | 21 (34.4)                                 | 17 (28.8)       | 23 (38.3)       | 15 (24.2)         |
| Minimally improved       | n (%) | 21 (34.4)                                 | 13 (22.0)       | 11 (18.3)       | 23 (37.1)         |
| No change                | n (%) | 7 (11.5)                                  | 6 (10.2)        | 5 (8.3)         | 11 (17.7)         |
| Minimally worse          | n (%) | 0 (0.0)                                   | 1 (1.7)         | 1 (1.7)         | 0 (0.0)           |
| Much worse               | n (%) | 0 (0.0)                                   | 0 (0.0)         | 1 (1.7)         | 1 (1.6)           |
| Very much worse          | n (%) | 0 (0.0)                                   | 0 (0.0)         | 0 (0.0)         | 1 (1.6)           |
| Two-sample Wilcoxon test |       | <i>P</i> = .158                           | <i>P</i> = .005 | <i>P</i> = .005 | ---               |

**eFigure.** Time Course of the Adjusted Weekly Mean Change  $\pm$  Standard Error in the Shiratori Severity Score

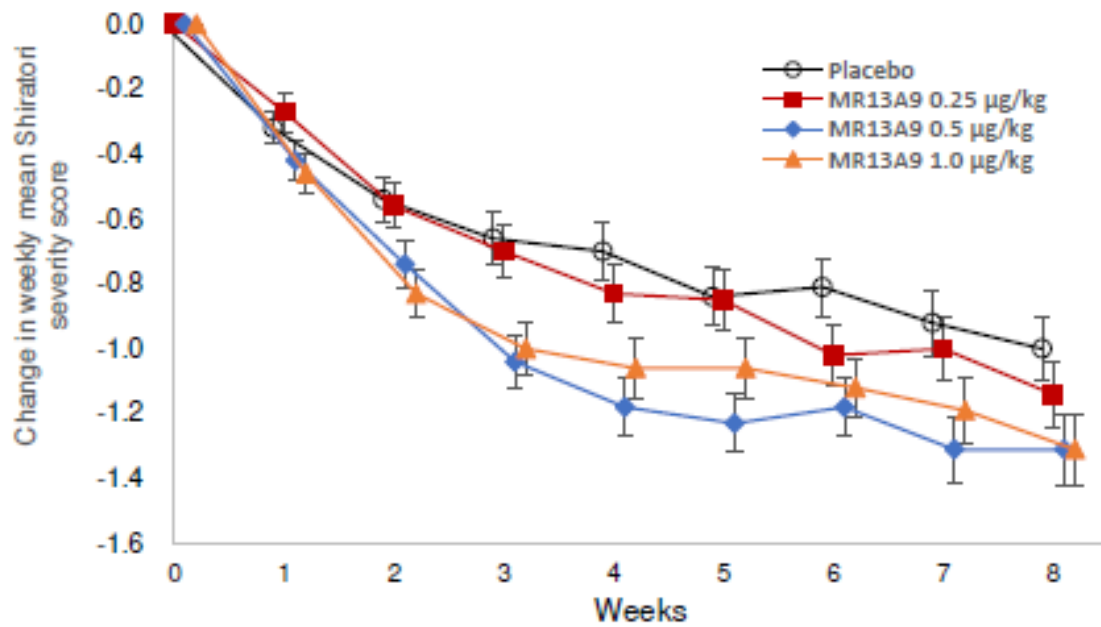

| No. of patients          |    |    |    |    |    |    |    |    |
|--------------------------|----|----|----|----|----|----|----|----|
| Placebo                  | 63 | 62 | 61 | 61 | 61 | 59 | 59 | 58 |
| Difelikefalin 0.25 µg/kg | 61 | 61 | 60 | 59 | 59 | 59 | 59 | 59 |
| Difelikefalin 0.5 µg/kg  | 60 | 57 | 58 | 56 | 55 | 54 | 53 | 53 |
| Difelikefalin 1.0 µg/kg  | 59 | 59 | 58 | 54 | 55 | 55 | 53 | 53 |
