# Supplementary material for: Efficacy and Safety of Difelikefalin in Japanese Patients With Moderate to Severe Pruritus Receiving Hemodialysis: A Randomized Clinical Trial
Source: PubMed Central journal article supplement — JAMA Netw Open. 2022 May 5;5(5):e2210339. doi: 10.1001/jamanetworkopen.2022.10339 (PMC9073569; doi:10.1001/jamanetworkopen.2022.10339), 2022-05-05
Supplement: jamanetwopen-e2210339-s003.pdf [file jamanetwopen-e2210339-s003.pdf]

\*First name, last name, and suffix (if applicable) are required and will appear in PubMed.

| <b>*Group Name(s): MR13A9-4 Trial Investigators</b> |                   |                              |                  |                                                               |                                          |                                                         |                                                                                            |
|-----------------------------------------------------|-------------------|------------------------------|------------------|---------------------------------------------------------------|------------------------------------------|---------------------------------------------------------|--------------------------------------------------------------------------------------------|
| <b>*First Name and Middle Initial(s)</b>            | <b>*Last Name</b> | <b>*Suffix (eg, Jr, III)</b> | Academic Degrees | Institution                                                   | Location (city, state/province, country) | Role or Contribution, eg, chair, principal investigator | Group (if more than 1 Group listed in the byline) and/or Subgroup (eg, Steering Committee) |
| Akikazu                                             | Yamamoto          |                              |                  | Hakuyoukai Hospital                                           |                                          |                                                         |                                                                                            |
| Akiko                                               | Ichikawa          |                              |                  | Kitakanto Cardiovascular Hospital                             |                                          |                                                         |                                                                                            |
| Akira                                               | Ohishi            |                              |                  | Ohishi Naika Clinic                                           |                                          |                                                         |                                                                                            |
| Atsunori                                            | Ishimura          |                              |                  | Fukuoka Tokushukai Hospital                                   |                                          |                                                         |                                                                                            |
| Haruki                                              | Fuse              |                              |                  | Maizuru Kyosai Hospital                                       |                                          |                                                         |                                                                                            |
| Hideaki                                             | Yoshida           |                              |                  | JR Sapporo Hospital                                           |                                          |                                                         |                                                                                            |
| Hidetoshi                                           | Yoshinaga         |                              |                  | Fukuoka Wajiro Hospital                                       |                                          |                                                         |                                                                                            |
| Hirokazu                                            | Okada             |                              |                  | Saitama Medical University Hospital                           |                                          |                                                         |                                                                                            |
| Hiromi                                              | Sanematsu         |                              |                  | Shinkai-Yamamoto Clinic                                       |                                          |                                                         |                                                                                            |
| Hiroshi                                             | Mizuno            |                              |                  | Inage Hospital                                                |                                          |                                                         |                                                                                            |
| Hiroshi                                             | Seshita           |                              |                  | Ueki Imafuji Clinic                                           |                                          |                                                         |                                                                                            |
| Hiroyuki                                            | Kinuno            |                              |                  | Toyama Rosai Hospital                                         |                                          |                                                         |                                                                                            |
| Hiroyuki                                            | Shimizu           |                              |                  | Hasegawa Hospital                                             |                                          |                                                         |                                                                                            |
| Hisakazu                                            | Degawa            |                              |                  | Miyamaedaira Kenei Clinic                                     |                                          |                                                         |                                                                                            |
| Hisaki                                              | Shimada           |                              |                  | Shinrakuen Hospital                                           |                                          |                                                         |                                                                                            |
| Isoji                                               | Sasagawa          |                              |                  | Yamagata Tokushukai Hospital                                  |                                          |                                                         |                                                                                            |
| Jong Il                                             | Kim               |                              |                  | Chibune Clinic                                                |                                          |                                                         |                                                                                            |
| Katsumi                                             | Takemura          |                              |                  | Takemura Medical Nephro Clinic                                |                                          |                                                         |                                                                                            |
| Kazue                                               | Matsuoka          |                              |                  | Ikeda Vascular Access • Dialysis and Internal Medicine Clinic |                                          |                                                         |                                                                                            |
| Keiichi                                             | Yoshimoto         |                              |                  | Kurobe City Hospital                                          |                                          |                                                         |                                                                                            |
| Keiya                                               | Miki              |                              |                  | Miki Internal Medicine Urology Clinic                         |                                          |                                                         |                                                                                            |
| Kenji                                               | Yaginuma          |                              |                  | JCHO Nihonmatsu Hospital                                      |                                          |                                                         |                                                                                            |
| Kitagawa                                            | Kiyoki            |                              |                  | Kanazawa Medical Center                                       |                                          |                                                         |                                                                                            |
| Kunihiro                                            | Shimoji           |                              |                  | Tomishiro Central Hospital                                    |                                          |                                                         |                                                                                            |
| Kuniko                                              | Takayama          |                              |                  | Takayama Hospital                                             |                                          |                                                         |                                                                                            |
| Machiko                                             | Oka               |                              |                  | Shonan Fujisawa Tokushukai Hospital                           |                                          |                                                         |                                                                                            |
| Makoto                                              | Tsuchida          |                              |                  | Tsuchida Internal Medicine Urology Department Clinic          |                                          |                                                         |                                                                                            |
| Mamoru                                              | Oki               |                              |                  | Seisyukai Clinic                                              |                                          |                                                         |                                                                                            |
| Manabu                                              | Ogura             |                              |                  | Ogura Clinic                                                  |                                          |                                                         |                                                                                            |

## Supplemental Online Content: Nonauthor Collaborators

\*First name, last name, and suffix (if applicable) are required and will appear in PubMed.

| *First Name and Middle Initial(s) | *Last Name | *Suffix (eg, Jr, III) | Academic Degrees | Institution                                                       | Location (city, state/province, country) | Role or Contribution, eg, chair, principal investigator | Group (if more than 1 Group listed in the byline) and/or Subgroup (eg, Steering Committee) |
|-----------------------------------|------------|-----------------------|------------------|-------------------------------------------------------------------|------------------------------------------|---------------------------------------------------------|--------------------------------------------------------------------------------------------|
| Masahiro                          | Kakahara   |                       |                  | Kakahara Clinic                                                   |                                          |                                                         |                                                                                            |
| Masahiro                          | Yanase     |                       |                  | Sunagawa City Medical Center                                      |                                          |                                                         |                                                                                            |
| Masakazu                          | Otsuka     |                       |                  | Tokiwa Clinic                                                     |                                          |                                                         |                                                                                            |
| Masami                            | Hashimoto  |                       |                  | Hashimoto Kidney Clinic                                           |                                          |                                                         |                                                                                            |
| Masanori                          | Matsukawa  |                       |                  | Takikawa Municipal Hospital                                       |                                          |                                                         |                                                                                            |
| Masaru                            | Mori       |                       |                  | Tsuchiura Beryl Clinic                                            |                                          |                                                         |                                                                                            |
| Masataka                          | Fukue      |                       |                  | Koga General Hospital                                             |                                          |                                                         |                                                                                            |
| Masatsugu                         | Sato       |                       |                  | Sato Nephrology and Urology Clinic                                |                                          |                                                         |                                                                                            |
| Mayumi                            | Yoshihara  |                       |                  | Hakodate Goryokaku Hospital                                       |                                          |                                                         |                                                                                            |
| Megumu                            | Fukunaga   |                       |                  | Toyonaka Keijinkai Clinic                                         |                                          |                                                         |                                                                                            |
| Morikuni                          | Nishihira  |                       |                  | Tomishiro Central Hospital                                        |                                          |                                                         |                                                                                            |
| Naofumi                           | Ikeda      |                       |                  | Sayama Renal Clinic                                               |                                          |                                                         |                                                                                            |
| Naokazu                           | Ueda       |                       |                  | Sabae Kidney Clinic                                               |                                          |                                                         |                                                                                            |
| Naoyuki                           | Odaguchi   |                       |                  | Chibana Clinic                                                    |                                          |                                                         |                                                                                            |
| Nobuyuki                          | Aizawa     |                       |                  | Shizuoka Tokushukai Hospital                                      |                                          |                                                         |                                                                                            |
| Norisato                          | Ikebe      |                       |                  | Kidney Clinic of Sanyo                                            |                                          |                                                         |                                                                                            |
| Noritomo                          | Itami      |                       |                  | Itami Kidney Clinic                                               |                                          |                                                         |                                                                                            |
| Noriyuki                          | Degawa     |                       |                  | Yamagata City Hospital Saiseikan                                  |                                          |                                                         |                                                                                            |
| Noriyuki                          | Okada      |                       |                  | Kajimoto Clinic                                                   |                                          |                                                         |                                                                                            |
| Sakae                             | Ishii      |                       |                  | Higashimatsuyama Kohjin Clinic                                    |                                          |                                                         |                                                                                            |
| Sakae                             | Miyazato   |                       |                  | Miyazato Naika Clinic                                             |                                          |                                                         |                                                                                            |
| Satoshi                           | Funakoshi  |                       |                  | Nagasaki Kindy Hospital                                           |                                          |                                                         |                                                                                            |
| Sawako                            | Fukazawa   |                       |                  | Sapporo Nephrology Clinic                                         |                                          |                                                         |                                                                                            |
| Shigeki                           | Ando       |                       |                  | Tohoku Medical and Pharmaceutical University Wakabayashi Hospital |                                          |                                                         |                                                                                            |
| Shigeki                           | Toma       |                       |                  | Toma Naika Clinic                                                 |                                          |                                                         |                                                                                            |
| Shinji                            | Hayashi    |                       |                  | Shinhoukai Hayashi Urology Clinic                                 |                                          |                                                         |                                                                                            |
| Shinji                            | Kageyama   |                       |                  | Kageyama Urological Clinic                                        |                                          |                                                         |                                                                                            |
| Shintaro                          | Yano       |                       |                  | Maebashi Hirosegawa Clinic                                        |                                          |                                                         |                                                                                            |
| Shoji                             | Fujisawa   |                       |                  | Tamana Urology Clinic                                             |                                          |                                                         |                                                                                            |
| Taihei                            | Yanagida   |                       |                  | Steel Memorial Yawata Hospital                                    |                                          |                                                         |                                                                                            |
| Takahiro                          | Yajima     |                       |                  | Matsunami General Hospital                                        |                                          |                                                         |                                                                                            |

## Supplemental Online Content: Nonauthor Collaborators

\*First name, last name, and suffix (if applicable) are required and will appear in PubMed.

| *First Name and Middle Initial(s) | *Last Name | *Suffix (eg, Jr, III) | Academic Degrees | Institution                       | Location (city, state/province, country) | Role or Contribution, eg, chair, principal investigator | Group (if more than 1 Group listed in the byline) and/or Subgroup (eg, Steering Committee) |
|-----------------------------------|------------|-----------------------|------------------|-----------------------------------|------------------------------------------|---------------------------------------------------------|--------------------------------------------------------------------------------------------|
| Takashi                           | Udagawa    |                       |                  | Nippon Koukan Hospital            |                                          |                                                         |                                                                                            |
| Takayuki                          | Toyoyama   |                       |                  | H·N·Medic Kitahiroshima           |                                          |                                                         |                                                                                            |
| Takeshi                           | Nakanishi  |                       |                  | Gojinkai Sumiyoshigawa Hospital   |                                          |                                                         |                                                                                            |
| Taro                              | Misaki     |                       |                  | Seirei Hamamatsu General Hospital |                                          |                                                         |                                                                                            |
| Tetsuya                           | Makiishi   |                       |                  | Saiseikai Shigaken Hospital       |                                          |                                                         |                                                                                            |
| Toko                              | Endo       |                       |                  | H·N·Medic                         |                                          |                                                         |                                                                                            |
| Tomio                             | Suzuki     |                       |                  | Suzukihinyoukika                  |                                          |                                                         |                                                                                            |
| Toru                              | Hasegawa   |                       |                  | Hasegawa Hospital                 |                                          |                                                         |                                                                                            |
| Toru                              | Kawai      |                       |                  | Chuo Naika Clinic                 |                                          |                                                         |                                                                                            |
| Toru                              | Shiratori  |                       |                  | JCHO Chiba Hospital               |                                          |                                                         |                                                                                            |
| Toshiki                           | Nishio     |                       |                  | Omi Fureai Hospital               |                                          |                                                         |                                                                                            |
| Toshiro                           | Shibata    |                       |                  | Takayama Red Cross Hospital       |                                          |                                                         |                                                                                            |
| Toshiya                           | Ishida     |                       |                  | Akita City Hospital               |                                          |                                                         |                                                                                            |
| Toshiyuki                         | Takahashi  |                       |                  | Koga General Hospital             |                                          |                                                         |                                                                                            |
| Toyonori                          | Saiki      |                       |                  | Saikijin Clinic                   |                                          |                                                         |                                                                                            |
| Tsutomu                           | Shikano    |                       |                  | Kyoto Okamoto Memorial Hospital   |                                          |                                                         |                                                                                            |
| Yasufumi                          | Takahashi  |                       |                  | Shinshu Ueda Medical Center       |                                          |                                                         |                                                                                            |
| Yasuhiro                          | Onodera    |                       |                  | Sapporo Tokushukai Hospital       |                                          |                                                         |                                                                                            |
| Yasuyuki                          | Ushioji    |                       |                  | Fukui-ken Saiseikai Hospital      |                                          |                                                         |                                                                                            |
| Yorihiko                          | Akamatsu   |                       |                  | Katta General Hospital            |                                          |                                                         |                                                                                            |
| Yoshihiko                         | Otsubo     |                       |                  | Shin Koga Clinic                  |                                          |                                                         |                                                                                            |
| Yoshimi                           | Shoji      |                       |                  | Makabe Hospital                   |                                          |                                                         |                                                                                            |
| Yosuke                            | Saka       |                       |                  | Kasugai Municipal Hospital        |                                          |                                                         |                                                                                            |
