# Supplementary material for: Efficacy and Safety of Difelikefalin in Japanese Patients With Moderate to Severe Pruritus Receiving Hemodialysis: A Randomized Clinical Trial
Source: PubMed Central journal article supplement — JAMA Netw Open. 2022 May 5;5(5):e2210339. doi: 10.1001/jamanetworkopen.2022.10339 (PMC9073569; doi:10.1001/jamanetworkopen.2022.10339), 2022-05-05
Supplement: jamanetwopen-e2210339-s004.pdf [file jamanetwopen-e2210339-s004.pdf]

## Data Sharing Statement

Narita. Efficacy and Safety of Difelikefalin in Japanese Patients With Moderate to Severe Pruritus Receiving Hemodialysis. *JAMA Netw Open*. Published May 05, 2022.  
doi:10.1001/jamanetworkopen.2022.10339

### Data

**Data available:** No
